# Supplementary material for: Multidrug-Resistant Listeria Species Shows Abundance in Environmental Waters of a Key District Municipality in South Africa
Source: PubMed Central journal article supplement (PMC7826511; doi:10.3390/ijerph18020481), 2021-01-08
Supplement: ijerph-18-00481-s001.pdf [file ijerph-18-00481-s001.pdf]

## Supplementary Figures

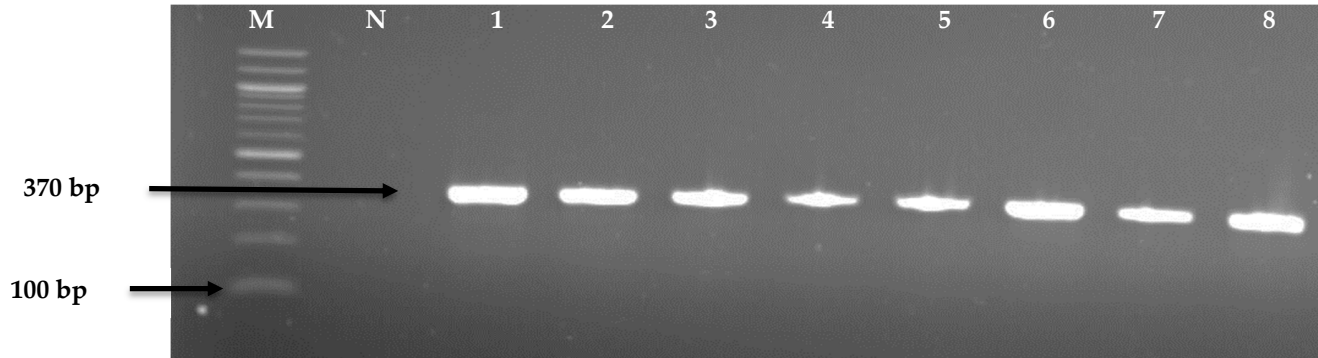

**Supplementary Figure S1.** PCR products of the amplification of *prs* gene. Lane 1-8: positive *Listeria* spp. isolates; Lane M: 100bp molecular weight marker (ThermoFisher™ Scientific, (EU) Lithuania); Lane N: negative PCR control (no DNA).

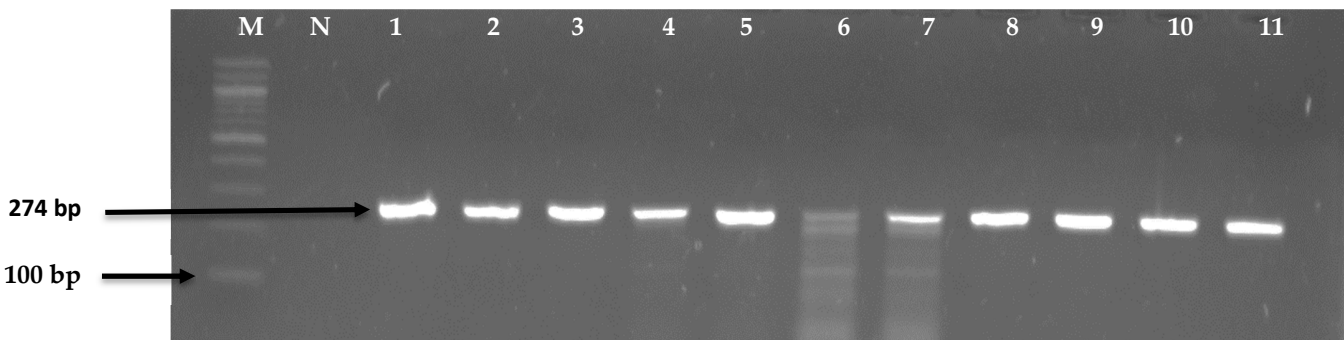

**Supplementary Figure S2.** PCR products of the amplification of *prfA* gene. Lane 1-11: positive *L. monocytogenes* isolates; Lane M: 100bp molecular weight marker (ThermoFisher™ Scientific, (EU) Lithuania); Lane N: negative PCR control (no DNA).

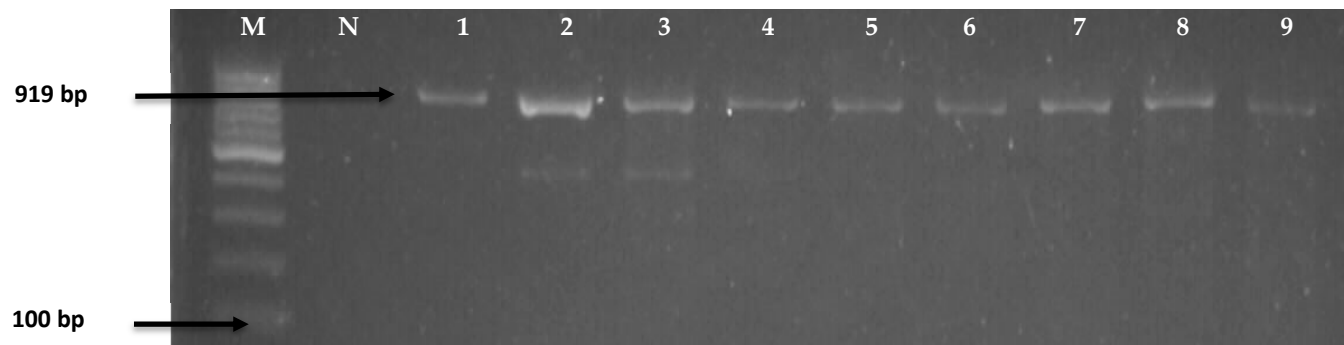

**Supplementary Figure S3.** PCR products of the amplification of 16S rRNA gene. Lane 1-9: positive *L. welshimeri* isolates; Lane M: 100bp molecular ladder (ThermoFisher™ Scientific, (EU) Lithuania); Lane N: negative PCR control (no DNA).

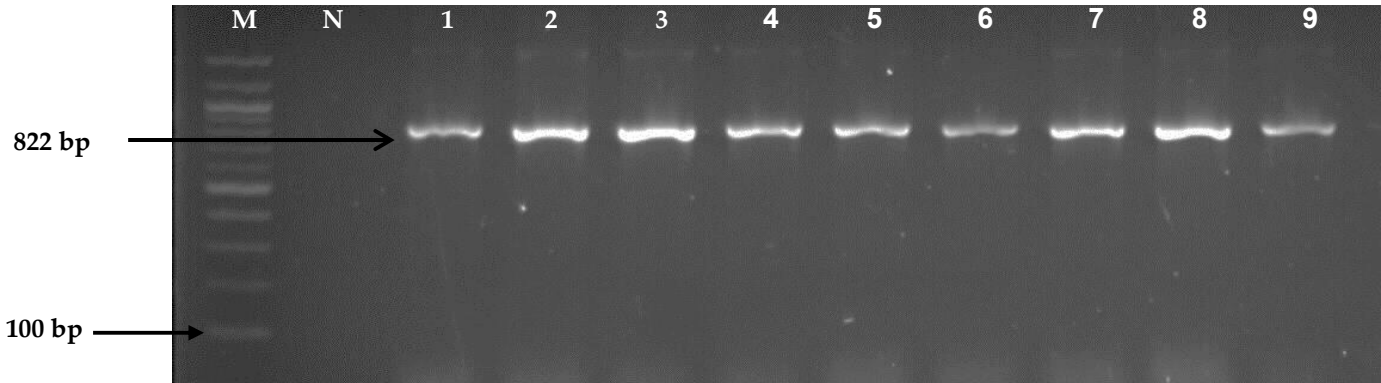

**Supplementary Figure S4.** PCR products of the amplification of *sull* gene. Lane 1-9: *Listeria* isolates that harbour *sull* gene (822 bp); lane M: 100bp molecular weight marker (ThermoFisher™ Scientific, (EU) Lithuania); Lane N: negative PCR control (no DNA).

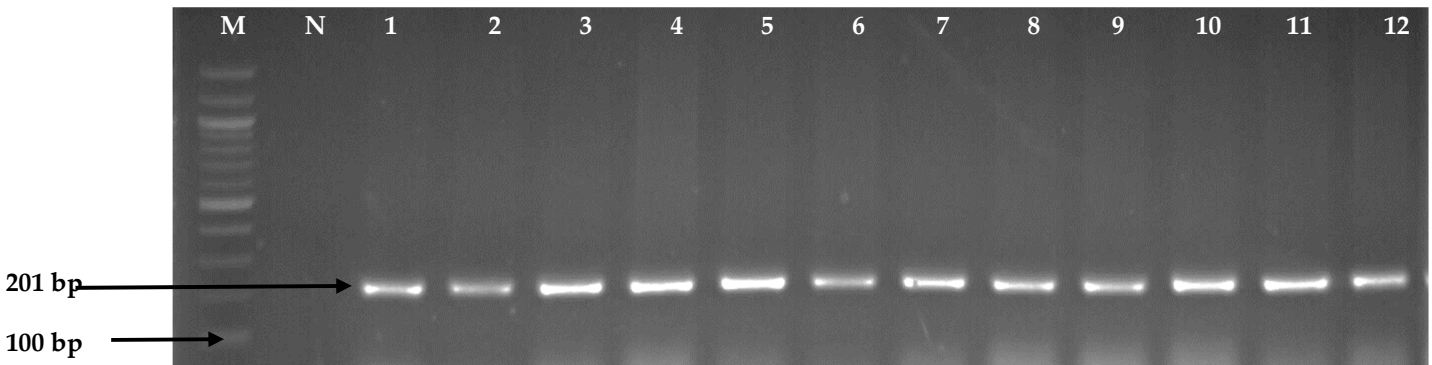

**Supplementary Figure S5.** PCR products of the amplification of *tetA* gene. Lane 1-12: *Listeria* isolates that harbour *tetA* gene (201 bp); lane M: 100bp molecular weight marker (ThermoFisher™ Scientific, (EU) Lithuania); Lane N: negative PCR control (no DNA).
